# Supplementary material for: Unravelling supramolecular features and opto-electronic properties of a binary charge transfer cocrystal of a blue fluorescent di-carbazole and TFT
Source: Royal Society of Chemistry journal article supplement (doi:10.1039/d2ce00555g), 2022-01-01
Supplement: d2ce00555g1.pdf [file d2ce00555g1.pdf]

## Unravelling Supramolecular Features and Opto-electronic Properties of Binary Charge Transfer Cocrystal of Blue Fluorescent Di-carbazole and TFT

Arkalekha Mandal,<sup>a\*</sup>Bhaskar Nath<sup>b</sup>

<sup>a</sup> School of Chemical Sciences, National Institute of Science Education and Research (NISER), HBNI, Bhubaneswar, PO Bhimpur -Padanpur, Via Jatni, District Khurda, Odisha 752050, India

<sup>b</sup> Department of Educational Science, Assam University, Silchar, Assam 788011, India

*Corresponding email address: [arkalekhamandal@gmail.com](mailto:arkalekhamandal@gmail.com)*

1. Crystallographic and refinement parameters of CBP:(TFT)<sub>2</sub>
2. Energy decomposition analysis for  $\pi \cdots \pi$  stacking in CBP:(TFT)<sub>2</sub>
3. Colour change during formation of CBP:(TFT)<sub>2</sub>
4. *ORTEP* diagram of CBP:(TFT)<sub>2</sub>
5. Fingerprint plots for CBP:(TFT)<sub>2</sub> cocrystal
6. Energy framework analysis for  $\pi \cdots \pi$  stacking interaction in CBP:(TFT)<sub>2</sub>
7. Molecular orbitals taking part in electronic transition of CBP
8. CIE colour coordinates for CBP:(TFT)<sub>2</sub>
9. Fluorescence lifetime for CBP:(TFT)<sub>2</sub>
10. Direct electron and hole transfer integrals in CBP:(TFT)<sub>2</sub>
11. Four point model of reorganization energy
12. TGA/DSC of the grinded solid
13. PXRD of the grinded solid
14. Absorption and emission spectra of cocrystal thin films
15. Excitation spectrum of cocrystal

**Table S1. Crystallographic and refinement parameters of cocrystal CBP:(TFT)<sub>2</sub>**

|                                                                                                   | <b>CBP:(TFT)<sub>2</sub></b>                                  |
|---------------------------------------------------------------------------------------------------|---------------------------------------------------------------|
| chemical formula                                                                                  | C <sub>52</sub> H <sub>24</sub> N <sub>6</sub> F <sub>8</sub> |
| formula weight                                                                                    | 884.77                                                        |
| temp (K)                                                                                          | 100(2)                                                        |
| CCDC Number                                                                                       | 2058993                                                       |
| crystal system                                                                                    | Triclinic                                                     |
| space group                                                                                       | <i>P</i> -1                                                   |
| <i>a</i> (Å)                                                                                      | 11.6287(12)                                                   |
| <i>b</i> (Å)                                                                                      | 12.9682(14)                                                   |
| <i>c</i> (Å)                                                                                      | 15.0674(14)                                                   |
| $\alpha$ (°)                                                                                      | 98.887(5)                                                     |
| $\beta$ (°)                                                                                       | 106.858(5)                                                    |
| $\gamma$ (°)                                                                                      | 108.238(4)                                                    |
| <i>V</i> (Å <sup>3</sup> )                                                                        | 1988.7(4)                                                     |
| <i>Z</i>                                                                                          | 2                                                             |
| <i>F</i> <sub>000</sub>                                                                           | 900                                                           |
| $\rho_{\text{calcd}}$ (g cm <sup>-3</sup> )                                                       | 1.478                                                         |
| no. of unique reflection                                                                          | 10049                                                         |
| no. of reflection ( <i>I</i> ≥ 2σ( <i>I</i> ))                                                    | 6718                                                          |
| R <sub>1</sub> <sup>a</sup> , R <sub>1</sub> <sup>b</sup> (all data, <i>I</i> ≥ 2σ( <i>I</i> ))   | 0.0803, 0.0440                                                |
| wR <sub>2</sub> <sup>a</sup> , wR <sub>2</sub> <sup>b</sup> (all data, <i>I</i> ≥ 2σ( <i>I</i> )) | 0.1134, 0.0956                                                |
| goodness of fit ( <i>F</i> <sup>2</sup> )                                                         | 1.020                                                         |
| largest peak/hole (e Å <sup>-3</sup> )                                                            | 0.260/ -0.290                                                 |

**Table S2. Energy decomposition analysis for π··π stacking in CBP:(TFT)<sub>2</sub>**

| <b>Interaction</b> | <b>E<sub>ele</sub>(kJ/mol)</b> | <b>E<sub>pol</sub>(kJ/mol)</b> | <b>E<sub>dis</sub>(kJ/mol)</b> | <b>E<sub>rep</sub>(kJ/mol)</b> | <b>E<sub>tot</sub>(kJ/mol)</b> |
|--------------------|--------------------------------|--------------------------------|--------------------------------|--------------------------------|--------------------------------|
| π··π Stacking      | -23.6                          | -8.5                           | -65.9                          | 36.6                           | -59.3                          |

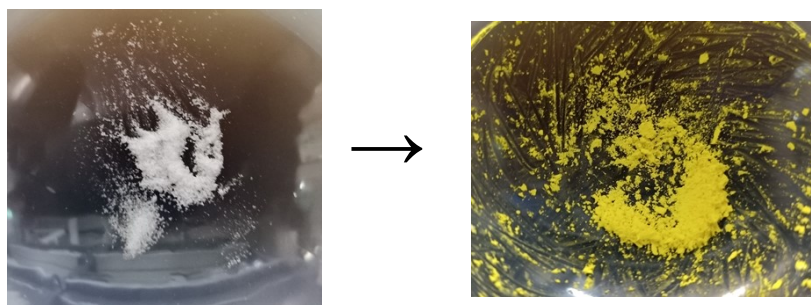

**Fig. S1** Instantaneous colour change during formation of cocrystal CBP:(TFT)<sub>2</sub>.

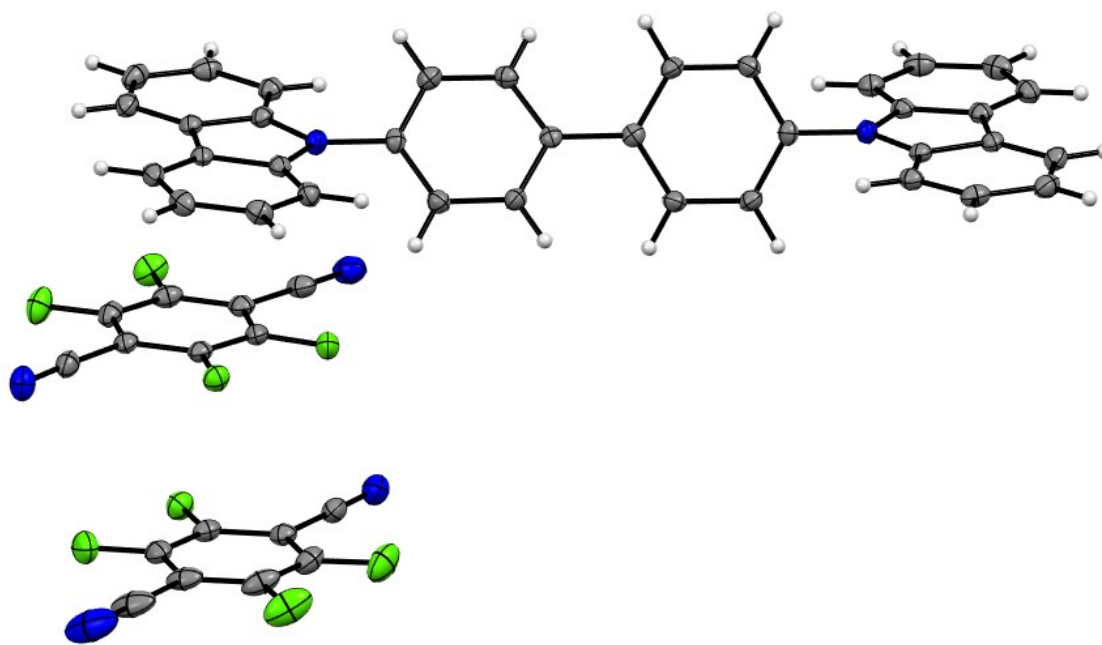

**Fig. S2** ORTEP diagram (45% probability) of cocrystal CBP:(TFT)<sub>2</sub>.

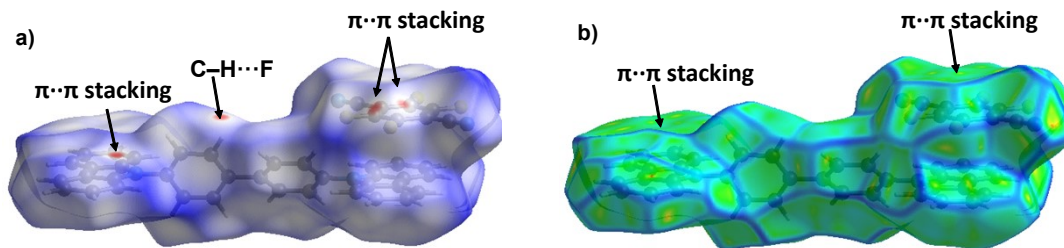

**Fig. S3a** (a) Hirshfeld surface analysis:  $d_{norm}$  plot; (b) Curvedness plot for D–A dimer.

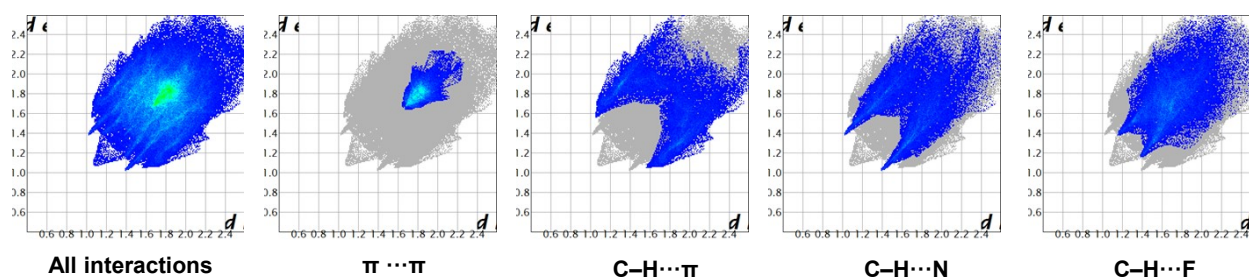

**Fig. S3b** Fingerprint plots of CBP:(TFT)<sub>2</sub>cocrystal.

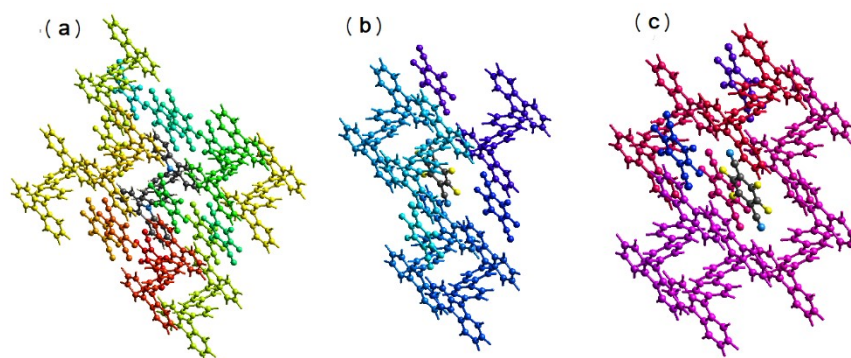

**Fig. S4a** Colour coding for the neighbouring molecules around (a) CBP; (b) TFT-1 and (c) TFT-2 molecules in CBP:(TFT)<sub>2</sub> cocrystal.

**Table S3: Interaction energies (kJ/mole) obtained from energy framework calculation for the cocrystal.**

**Energy Profile for “Residue 1”**

|  | N | Symop      | R     | Electron Density | E_ele | E_pol | E_dis | E_rep | E_tot |
|--|---|------------|-------|------------------|-------|-------|-------|-------|-------|
|  | 1 | -          | 14.77 | B3LYP/6-31G(d,p) | -3.7  | -1.3  | -7.6  | 0.0   | -11.4 |
|  | 1 | -x, -y, -z | 10.60 | B3LYP/6-31G(d,p) | -10.3 | -1.0  | -55.0 | 38.0  | -36.1 |
|  | 1 | -          | 7.91  | B3LYP/6-31G(d,p) | 0.0   | nan   | 0.0   | 0.0   | nan   |
|  | 1 | -x, -y, -z | 8.93  | B3LYP/6-31G(d,p) | 0.0   | 0.0   | 0.0   | 0.0   | 0.0   |
|  | 1 | -          | 14.43 | B3LYP/6-31G(d,p) | -0.0  | -0.0  | -0.8  | 0.0   | -0.8  |
|  | 1 | -x, -y, -z | 9.07  | B3LYP/6-31G(d,p) | -16.1 | -3.7  | -54.4 | 38.1  | -43.5 |
|  | 2 | x, y, z    | 16.14 | B3LYP/6-31G(d,p) | -4.7  | -0.1  | -7.2  | 0.0   | -11.4 |
|  | 1 | -          | 6.69  | B3LYP/6-31G(d,p) | -4.0  | -1.5  | -18.3 | 8.6   | -16.0 |
|  | 2 | x, y, z    | 18.30 | B3LYP/6-31G(d,p) | -4.9  | -0.1  | -7.5  | 0.0   | -11.9 |
|  | 1 | -          | 6.84  | B3LYP/6-31G(d,p) | -10.3 | -1.0  | -55.0 | 38.0  | -36.1 |
|  | 1 | -x, -y, -z | 8.71  | B3LYP/6-31G(d,p) | -15.6 | -3.6  | -53.2 | 36.3  | -43.1 |
|  | 1 | -          | 8.04  | B3LYP/6-31G(d,p) | -17.8 | -6.2  | -65.9 | 45.2  | -52.8 |
|  | 1 | -x, -y, -z | 20.76 | B3LYP/6-31G(d,p) | 0.7   | -0.1  | -4.5  | 0.0   | -3.3  |
|  | 1 | -          | 7.46  | B3LYP/6-31G(d,p) | -13.7 | -4.9  | -50.0 | 31.2  | -42.4 |
|  | 1 | -          | 14.16 | B3LYP/6-31G(d,p) | -0.5  | -0.3  | -7.9  | 0.0   | -7.7  |
|  | 1 | -          | 10.68 | B3LYP/6-31G(d,p) | -4.6  | -0.1  | -7.2  | 0.0   | -11.3 |
|  | 1 | -          | 9.00  | B3LYP/6-31G(d,p) | 1.2   | -0.1  | -2.7  | 0.0   | -1.1  |
|  | 1 | -          | 14.46 | B3LYP/6-31G(d,p) | -16.1 | -3.7  | -54.4 | 38.1  | -43.5 |
|  | 1 | -          | 12.21 | B3LYP/6-31G(d,p) | -7.9  | -0.5  | -8.8  | 0.0   | -16.4 |
|  | 0 | -x, -y, -z | 7.88  | B3LYP/6-31G(d,p) | -10.8 | -1.6  | -11.8 | 9.4   | -17.0 |
|  | 0 | -          | 8.04  | B3LYP/6-31G(d,p) | -17.8 | -6.2  | -65.9 | 45.2  | -52.8 |
|  | 0 | -          | 6.69  | B3LYP/6-31G(d,p) | -4.0  | -1.5  | -18.3 | 8.6   | -16.0 |
|  | 0 | -          | 14.77 | B3LYP/6-31G(d,p) | -2.9  | -1.3  | -7.6  | 0.0   | -10.5 |
|  | 0 | -          | 12.21 | B3LYP/6-31G(d,p) | -7.8  | -0.5  | -8.8  | 0.0   | -16.2 |

|   |            |       |                  |       |      |       |      |       |
|---|------------|-------|------------------|-------|------|-------|------|-------|
| 0 | -          | 6.53  | B3LYP/6-31G(d,p) | 0.1   | -0.1 | -1.6  | 0.0  | -1.3  |
| 0 | -          | 7.46  | B3LYP/6-31G(d,p) | -13.7 | -4.9 | -50.0 | 31.2 | -42.4 |
| 0 | -          | 14.16 | B3LYP/6-31G(d,p) | -1.2  | -0.3 | -7.9  | 0.0  | -8.4  |
| 0 | -          | 10.29 | B3LYP/6-31G(d,p) | -4.0  | -1.5 | -18.3 | 8.6  | -16.0 |
| 0 | -          | 12.73 | B3LYP/6-31G(d,p) | 0.2   | -0.0 | -0.2  | 0.0  | 0.0   |
| 0 | -          | 9.19  | B3LYP/6-31G(d,p) | -0.2  | -0.0 | -0.2  | 0.0  | -0.4  |
| 0 | -          | 14.43 | B3LYP/6-31G(d,p) | -0.0  | -0.0 | -0.8  | 0.0  | -0.8  |
| 0 | -          | 9.00  | B3LYP/6-31G(d,p) | 1.2   | -0.1 | -2.7  | 0.0  | -1.1  |
| 0 | -          | 6.84  | B3LYP/6-31G(d,p) | -10.3 | -1.0 | -55.0 | 38.0 | -36.1 |
| 0 | -          | 7.91  | B3LYP/6-31G(d,p) | 0.0   | nan  | 0.0   | 0.0  | nan   |
| 0 | -x, -y, -z | 7.65  | B3LYP/6-31G(d,p) | -0.0  | -0.0 | -0.8  | 0.0  | -0.8  |
| 0 | -          | 10.68 | B3LYP/6-31G(d,p) | -4.7  | -0.1 | -7.2  | 0.0  | -11.4 |
| 0 | -          | 14.46 | B3LYP/6-31G(d,p) | -16.1 | -3.7 | -54.4 | 38.1 | -43.5 |

### Energy Profile for "Residue 2"

| N | Symop      | R     | Electron Density | E_ele | E_pol | E_dis | E_rep | E_tot |
|---|------------|-------|------------------|-------|-------|-------|-------|-------|
| 0 | -          | 14.77 | B3LYP/6-31G(d,p) | -3.7  | -1.3  | -7.6  | 0.0   | -11.4 |
| 0 | -x, -y, -z | 10.60 | B3LYP/6-31G(d,p) | -10.3 | -1.0  | -55.0 | 38.0  | -36.1 |
| 0 | -          | 7.91  | B3LYP/6-31G(d,p) | 0.0   | nan   | 0.0   | 0.0   | nan   |
| 0 | -x, -y, -z | 8.93  | B3LYP/6-31G(d,p) | 0.0   | 0.0   | 0.0   | 0.0   | 0.0   |
| 0 | -          | 14.43 | B3LYP/6-31G(d,p) | -0.0  | -0.0  | -0.8  | 0.0   | -0.8  |
| 0 | -x, -y, -z | 9.07  | B3LYP/6-31G(d,p) | -16.1 | -3.7  | -54.4 | 38.1  | -43.5 |
| 0 | x, y, z    | 16.14 | B3LYP/6-31G(d,p) | -4.7  | -0.1  | -7.2  | 0.0   | -11.4 |
| 0 | -          | 6.69  | B3LYP/6-31G(d,p) | -4.0  | -1.5  | -18.3 | 8.6   | -16.0 |
| 0 | x, y, z    | 18.30 | B3LYP/6-31G(d,p) | -4.9  | -0.1  | -7.5  | 0.0   | -11.9 |
| 0 | -          | 6.84  | B3LYP/6-31G(d,p) | -10.3 | -1.0  | -55.0 | 38.0  | -36.1 |
| 0 | -x, -y, -z | 8.71  | B3LYP/6-31G(d,p) | -15.6 | -3.6  | -53.2 | 36.3  | -43.1 |
| 0 | -          | 8.04  | B3LYP/6-31G(d,p) | -17.8 | -6.2  | -65.9 | 45.2  | -52.8 |

|   |            |       |                  |       |      |       |      |       |
|---|------------|-------|------------------|-------|------|-------|------|-------|
| 0 | -x, -y, -z | 20.76 | B3LYP/6-31G(d,p) | 0.7   | -0.1 | -4.5  | 0.0  | -3.3  |
| 0 | -          | 7.46  | B3LYP/6-31G(d,p) | -13.7 | -4.9 | -50.0 | 31.2 | -42.4 |
| 0 | -          | 14.16 | B3LYP/6-31G(d,p) | -0.5  | -0.3 | -7.9  | 0.0  | -7.7  |
| 0 | -          | 10.68 | B3LYP/6-31G(d,p) | -4.6  | -0.1 | -7.2  | 0.0  | -11.3 |
| 0 | -          | 9.00  | B3LYP/6-31G(d,p) | 1.2   | -0.1 | -2.7  | 0.0  | -1.1  |
| 0 | -          | 14.46 | B3LYP/6-31G(d,p) | -16.1 | -3.7 | -54.4 | 38.1 | -43.5 |
| 0 | -          | 12.21 | B3LYP/6-31G(d,p) | -7.9  | -0.5 | -8.8  | 0.0  | -16.4 |
| 1 | -x, -y, -z | 7.88  | B3LYP/6-31G(d,p) | -10.8 | -1.6 | -11.8 | 9.4  | -17.0 |
| 1 | -          | 8.04  | B3LYP/6-31G(d,p) | -17.8 | -6.2 | -65.9 | 45.2 | -52.8 |
| 1 | -          | 6.69  | B3LYP/6-31G(d,p) | -4.0  | -1.5 | -18.3 | 8.6  | -16.0 |
| 1 | -          | 14.77 | B3LYP/6-31G(d,p) | -2.9  | -1.3 | -7.6  | 0.0  | -10.5 |
| 1 | -          | 12.21 | B3LYP/6-31G(d,p) | -7.8  | -0.5 | -8.8  | 0.0  | -16.2 |
| 1 | -          | 6.53  | B3LYP/6-31G(d,p) | 0.1   | -0.1 | -1.6  | 0.0  | -1.3  |
| 1 | -          | 7.46  | B3LYP/6-31G(d,p) | -13.7 | -4.9 | -50.0 | 31.2 | -42.4 |
| 1 | -          | 14.16 | B3LYP/6-31G(d,p) | -1.2  | -0.3 | -7.9  | 0.0  | -8.4  |
| 1 | -          | 10.29 | B3LYP/6-31G(d,p) | -4.0  | -1.5 | -18.3 | 8.6  | -16.0 |
| 0 | -          | 12.73 | B3LYP/6-31G(d,p) | 0.2   | -0.0 | -0.2  | 0.0  | 0.0   |
| 0 | -          | 9.19  | B3LYP/6-31G(d,p) | -0.2  | -0.0 | -0.2  | 0.0  | -0.4  |
| 0 | -          | 14.43 | B3LYP/6-31G(d,p) | -0.0  | -0.0 | -0.8  | 0.0  | -0.8  |
| 0 | -          | 9.00  | B3LYP/6-31G(d,p) | 1.2   | -0.1 | -2.7  | 0.0  | -1.1  |
| 0 | -          | 6.84  | B3LYP/6-31G(d,p) | -10.3 | -1.0 | -55.0 | 38.0 | -36.1 |
| 0 | -          | 7.91  | B3LYP/6-31G(d,p) | 0.0   | nan  | 0.0   | 0.0  | nan   |
| 0 | -x, -y, -z | 7.65  | B3LYP/6-31G(d,p) | -0.0  | -0.0 | -0.8  | 0.0  | -0.8  |
| 0 | -          | 10.68 | B3LYP/6-31G(d,p) | -4.7  | -0.1 | -7.2  | 0.0  | -11.4 |
| 0 | -          | 14.46 | B3LYP/6-31G(d,p) | -16.1 | -3.7 | -54.4 | 38.1 | -43.5 |

**Energy Profile for “Residue 3”**

|  | N | Symop      | R     | Electron Density | E_ele | E_pol | E_dis | E_rep | E_tot |
|--|---|------------|-------|------------------|-------|-------|-------|-------|-------|
|  | 0 | -          | 14.77 | B3LYP/6-31G(d,p) | -3.7  | -1.3  | -7.6  | 0.0   | -11.4 |
|  | 0 | -x, -y, -z | 10.60 | B3LYP/6-31G(d,p) | -10.3 | -1.0  | -55.0 | 38.0  | -36.1 |
|  | 0 | -          | 7.91  | B3LYP/6-31G(d,p) | 0.0   | nan   | 0.0   | 0.0   | nan   |
|  | 0 | -x, -y, -z | 8.93  | B3LYP/6-31G(d,p) | 0.0   | 0.0   | 0.0   | 0.0   | 0.0   |
|  | 0 | -          | 14.43 | B3LYP/6-31G(d,p) | -0.0  | -0.0  | -0.8  | 0.0   | -0.8  |
|  | 0 | -x, -y, -z | 9.07  | B3LYP/6-31G(d,p) | -16.1 | -3.7  | -54.4 | 38.1  | -43.5 |
|  | 0 | x, y, z    | 16.14 | B3LYP/6-31G(d,p) | -4.7  | -0.1  | -7.2  | 0.0   | -11.4 |
|  | 0 | -          | 6.69  | B3LYP/6-31G(d,p) | -4.0  | -1.5  | -18.3 | 8.6   | -16.0 |
|  | 0 | x, y, z    | 18.30 | B3LYP/6-31G(d,p) | -4.9  | -0.1  | -7.5  | 0.0   | -11.9 |
|  | 0 | -          | 6.84  | B3LYP/6-31G(d,p) | -10.3 | -1.0  | -55.0 | 38.0  | -36.1 |
|  | 0 | -x, -y, -z | 8.71  | B3LYP/6-31G(d,p) | -15.6 | -3.6  | -53.2 | 36.3  | -43.1 |
|  | 0 | -          | 8.04  | B3LYP/6-31G(d,p) | -17.8 | -6.2  | -65.9 | 45.2  | -52.8 |
|  | 0 | -x, -y, -z | 20.76 | B3LYP/6-31G(d,p) | 0.7   | -0.1  | -4.5  | 0.0   | -3.3  |
|  | 0 | -          | 7.46  | B3LYP/6-31G(d,p) | -13.7 | -4.9  | -50.0 | 31.2  | -42.4 |
|  | 0 | -          | 14.16 | B3LYP/6-31G(d,p) | -0.5  | -0.3  | -7.9  | 0.0   | -7.7  |
|  | 0 | -          | 10.68 | B3LYP/6-31G(d,p) | -4.6  | -0.1  | -7.2  | 0.0   | -11.3 |
|  | 0 | -          | 9.00  | B3LYP/6-31G(d,p) | 1.2   | -0.1  | -2.7  | 0.0   | -1.1  |
|  | 0 | -          | 14.46 | B3LYP/6-31G(d,p) | -16.1 | -3.7  | -54.4 | 38.1  | -43.5 |
|  | 0 | -          | 12.21 | B3LYP/6-31G(d,p) | -7.9  | -0.5  | -8.8  | 0.0   | -16.4 |
|  | 0 | -x, -y, -z | 7.88  | B3LYP/6-31G(d,p) | -10.8 | -1.6  | -11.8 | 9.4   | -17.0 |
|  | 0 | -          | 8.04  | B3LYP/6-31G(d,p) | -17.8 | -6.2  | -65.9 | 45.2  | -52.8 |
|  | 0 | -          | 6.69  | B3LYP/6-31G(d,p) | -4.0  | -1.5  | -18.3 | 8.6   | -16.0 |
|  | 0 | -          | 14.77 | B3LYP/6-31G(d,p) | -2.9  | -1.3  | -7.6  | 0.0   | -10.5 |
|  | 0 | -          | 12.21 | B3LYP/6-31G(d,p) | -7.8  | -0.5  | -8.8  | 0.0   | -16.2 |
|  | 1 | -          | 6.53  | B3LYP/6-31G(d,p) | 0.1   | -0.1  | -1.6  | 0.0   | -1.3  |
|  | 0 | -          | 7.46  | B3LYP/6-31G(d,p) | -13.7 | -4.9  | -50.0 | 31.2  | -42.4 |



|   |            |       |                  |       |      |       |      |       |
|---|------------|-------|------------------|-------|------|-------|------|-------|
| 0 | -          | 14.16 | B3LYP/6-31G(d,p) | -1.2  | -0.3 | -7.9  | 0.0  | -8.4  |
| 1 | -          | 10.29 | B3LYP/6-31G(d,p) | -4.0  | -1.5 | -18.3 | 8.6  | -16.0 |
| 0 | -          | 12.73 | B3LYP/6-31G(d,p) | 0.2   | -0.0 | -0.2  | 0.0  | 0.0   |
| 0 | -          | 9.19  | B3LYP/6-31G(d,p) | -0.2  | -0.0 | -0.2  | 0.0  | -0.4  |
| 1 | -          | 14.43 | B3LYP/6-31G(d,p) | -0.0  | -0.0 | -0.8  | 0.0  | -0.8  |
| 1 | -          | 9.00  | B3LYP/6-31G(d,p) | 1.2   | -0.1 | -2.7  | 0.0  | -1.1  |
| 1 | -          | 6.84  | B3LYP/6-31G(d,p) | -10.3 | -1.0 | -55.0 | 38.0 | -36.1 |
| 1 | -          | 7.91  | B3LYP/6-31G(d,p) | 0.0   | nan  | 0.0   | 0.0  | nan   |
| 1 | -x, -y, -z | 7.65  | B3LYP/6-31G(d,p) | -0.0  | -0.0 | -0.8  | 0.0  | -0.8  |
| 1 | -          | 10.68 | B3LYP/6-31G(d,p) | -4.7  | -0.1 | -7.2  | 0.0  | -11.4 |
| 1 | -          | 14.46 | B3LYP/6-31G(d,p) | -16.1 | -3.7 | -54.4 | 38.1 | -43.5 |

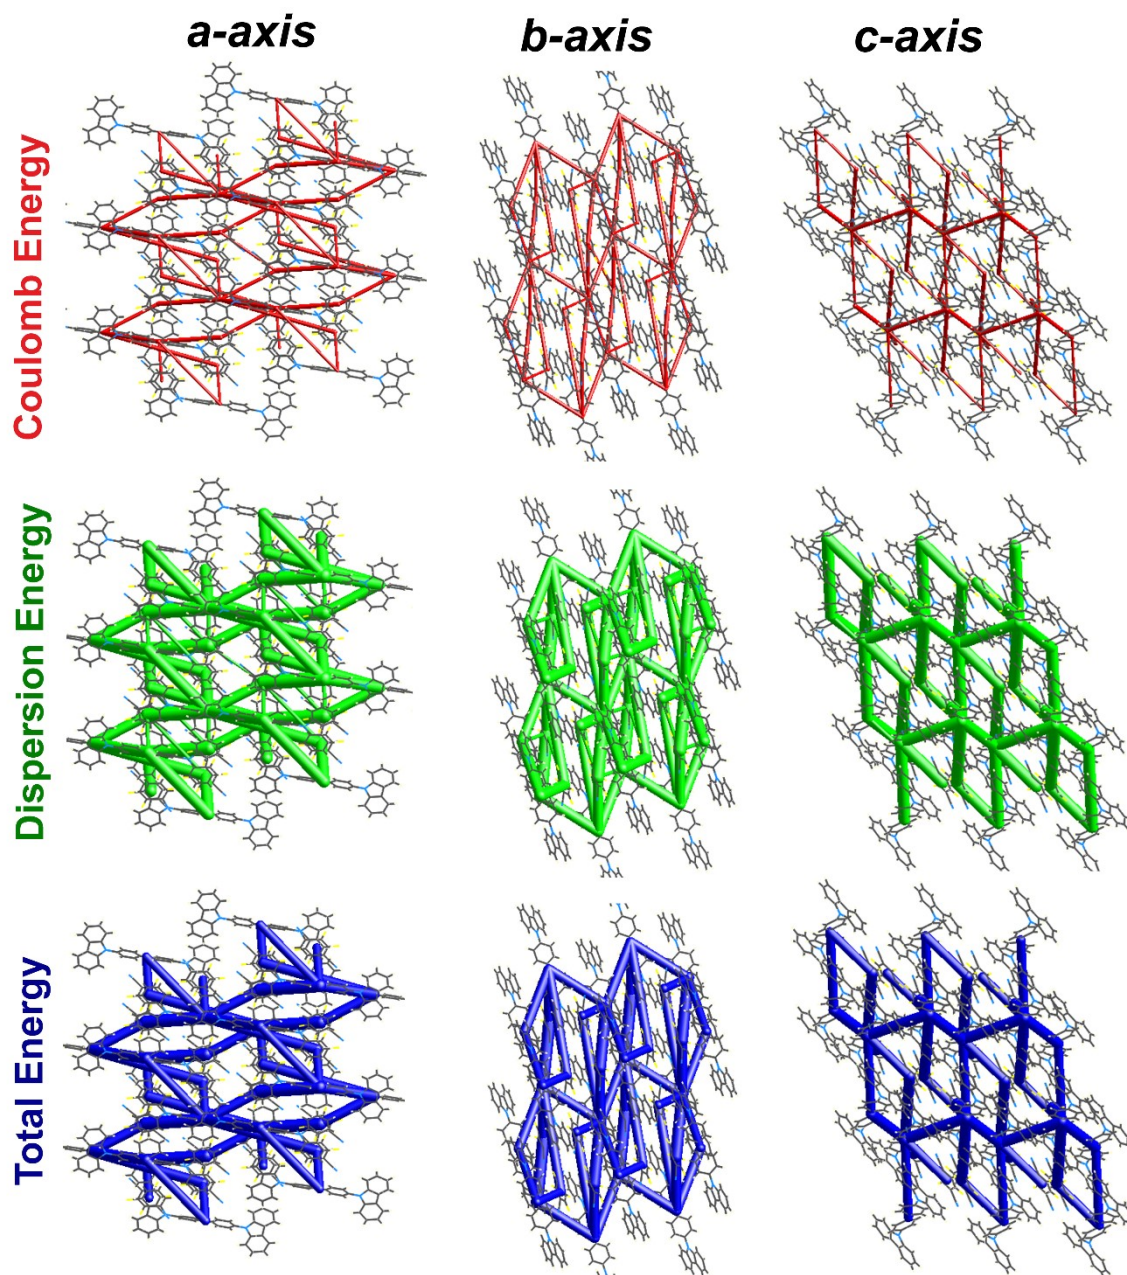

**Fig. S4b** Energy framework analyses; a) Total energy along crystallographic *a*, *b* and *c* axes; b) Electrostatic energy along crystallographic *a*, *b* and *c* axes; c) Dispersion energy along crystallographic *a*, *b* and *c* axes.

**Table S4: Interaction Energies as obtained from CrystalExplorer**

| $E_{elec}$ | $E_{pol}$ | $E_{dis}$ | $E_{repl.}$ | $E_{tot}$ | <i>Average</i> $E_{tot}$<br>(kJ/mole) |
|------------|-----------|-----------|-------------|-----------|---------------------------------------|
| -55.71     | -9.03     | -160.84   | 66.92       | -158.66   | -158.66                               |

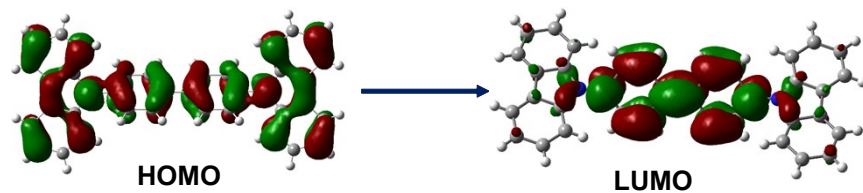

**Fig. S5** Molecular orbitals taking part in electronic transition in pristine CBP, calculated at NTO/CAM-B3YP/6-31G(d,p) level.

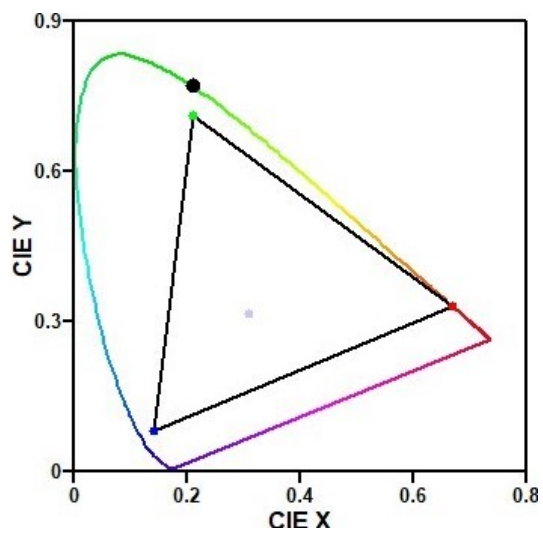

**Fig. S6** Colour coordinates for CBP:(TFT)<sub>2</sub>cocrystal (black circle).

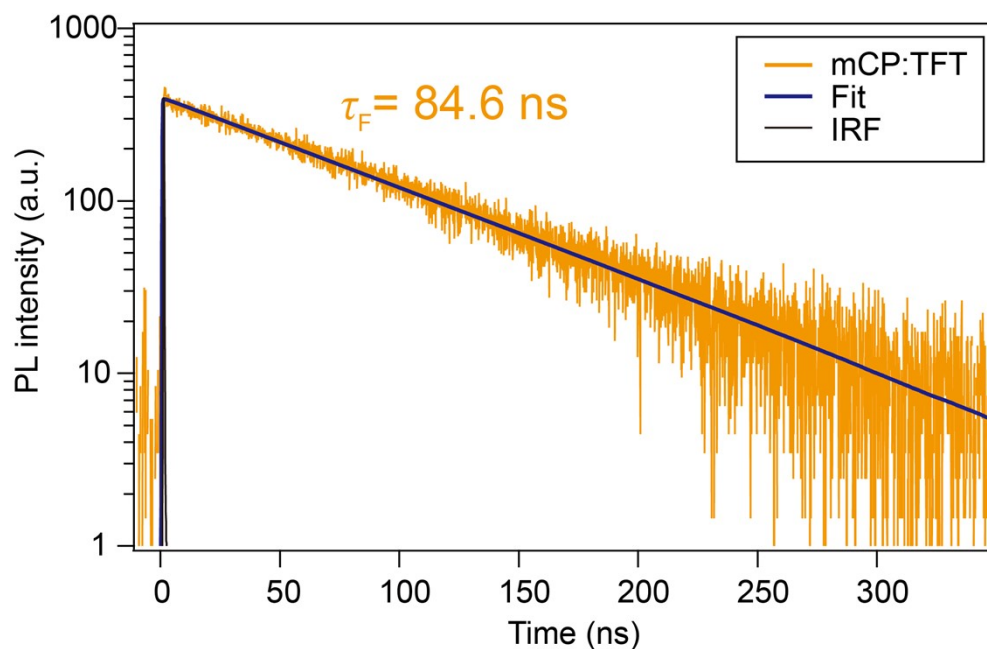

**Fig. S7** Time-resolved photoluminescence (PL) decay profile monitored at 535 nm and fitting results with single-exponential decay function in cocystal CBP:(TFT)<sub>2</sub>.

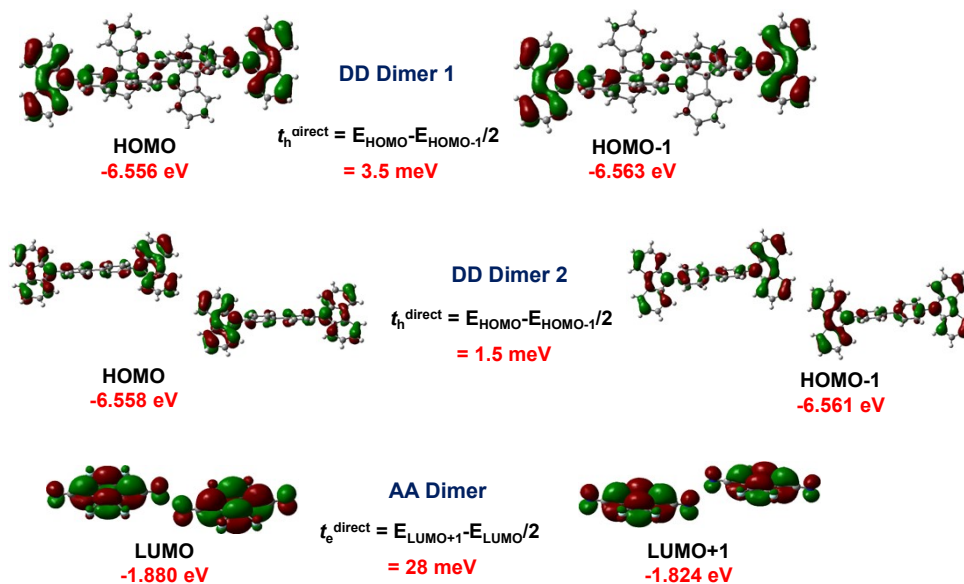

**Fig. S8** Direct hole and electron transfer integral in cocystal CBP:(TFT)<sub>2</sub>.

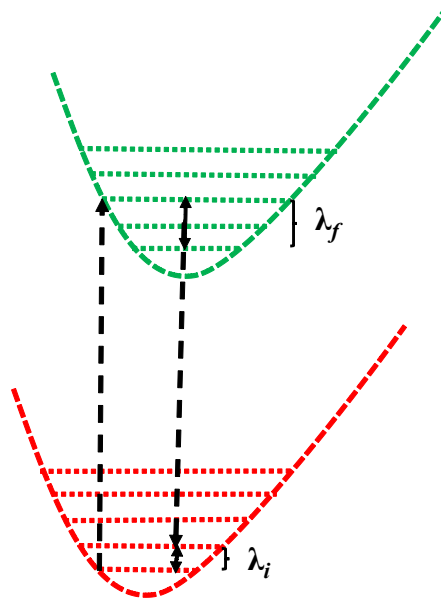

Fig. S9 Four point model for reorganization energy calculation.

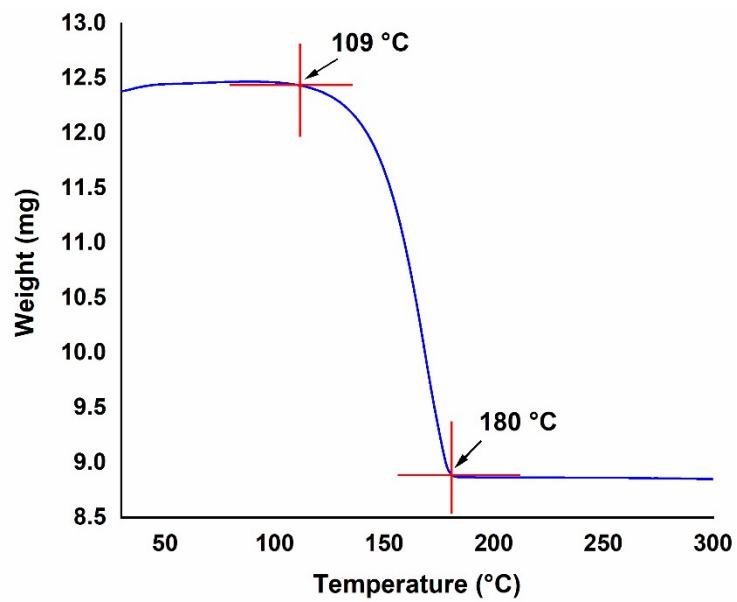

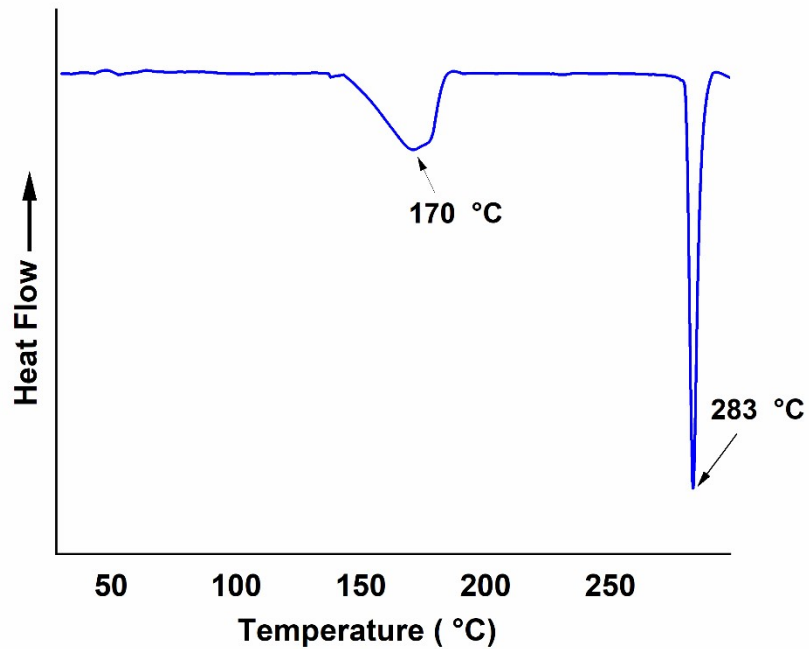

**Fig. S10** TGA/ DSC of the grinded solid.

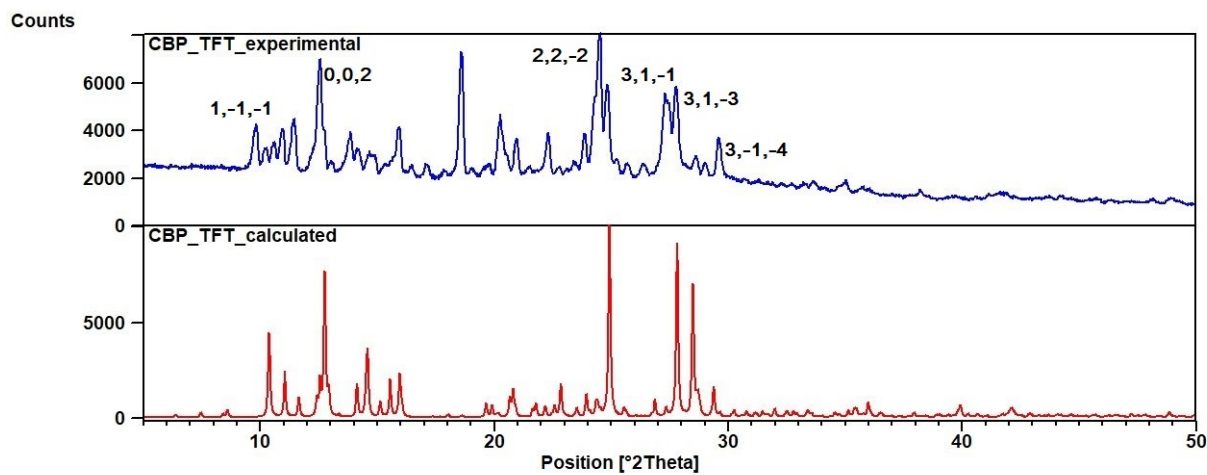

**Fig. S11** The PXRD of the grinded solid.

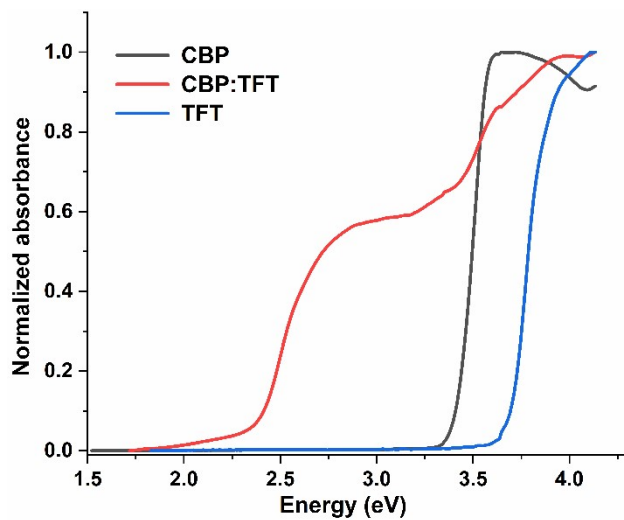

**Fig. S12a** Absorption spectra of CBP:(TFT)<sub>2</sub> cocrystals and cofomers in drop-cast thin film.

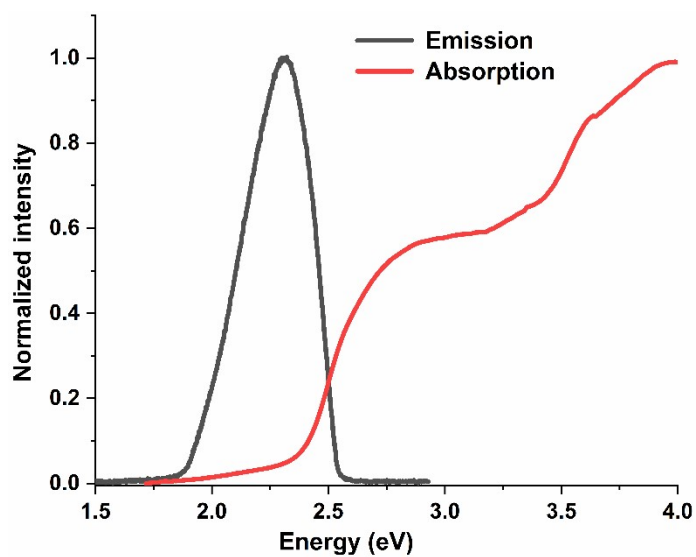

**Fig. S12b** Absorption and emission spectra of CBP:(TFT)<sub>2</sub> spin-coated thin film.

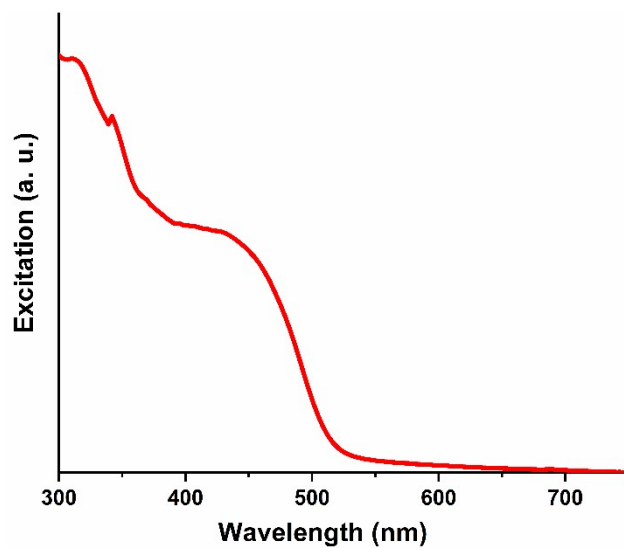

**Fig. S13** Excitation spectrum of CBP:(TFT)<sub>2</sub> spin-coated thin film, emission at 550 nm.

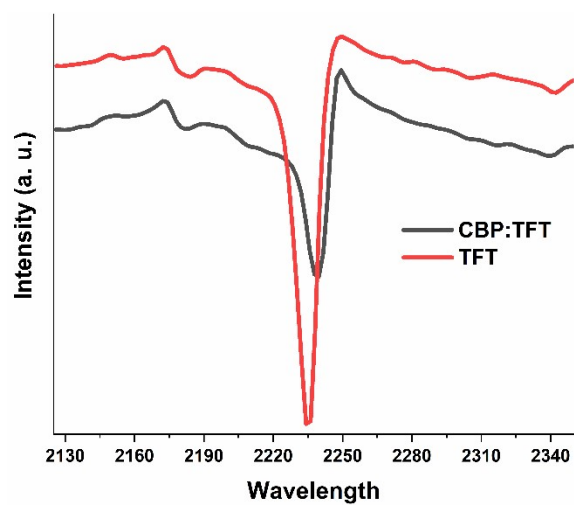

**Fig. S14** FTIR spectra of CBP:(TFT)<sub>2</sub> and TFT showing C≡N stretching.
